# Supplementary material
Source: PubMed Central journal article supplement (PMC470733)

ARF6(Q67L)

Gelatin

Merge

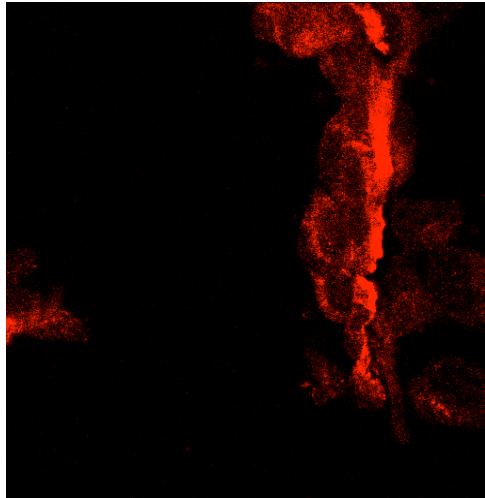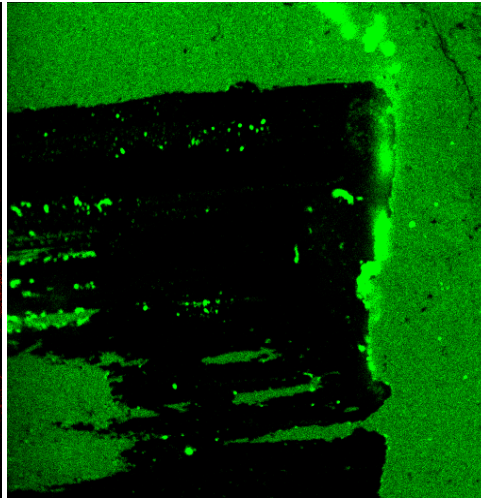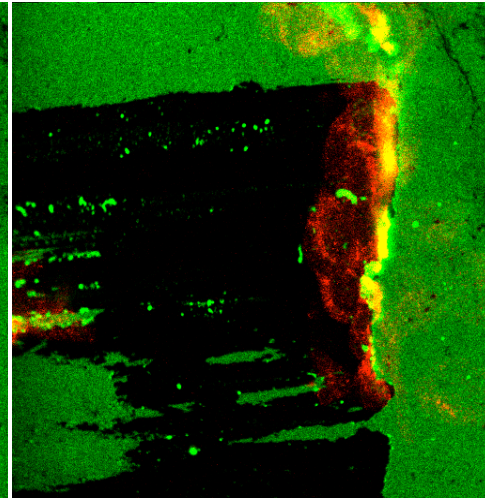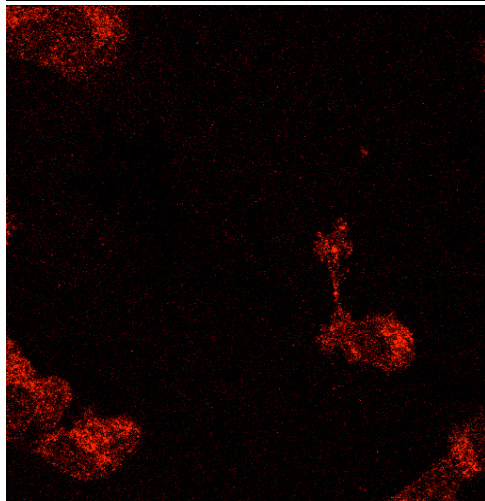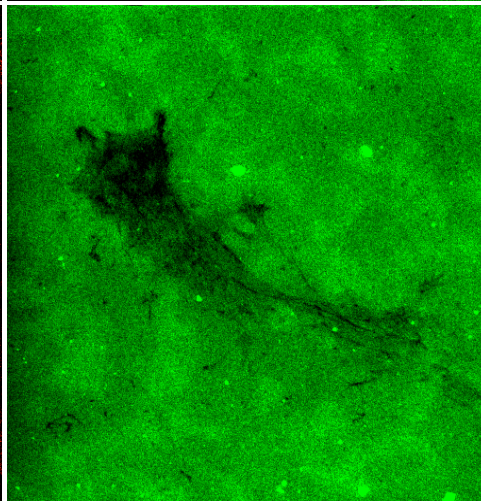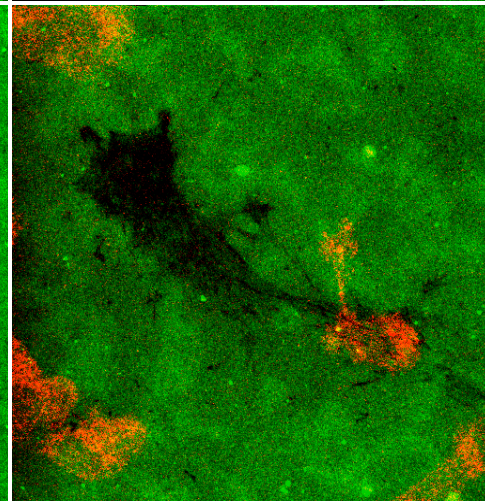

Supplement: pnas_101_26_9671__1.pdf [file pnas_101_26_9671__1.pdf]

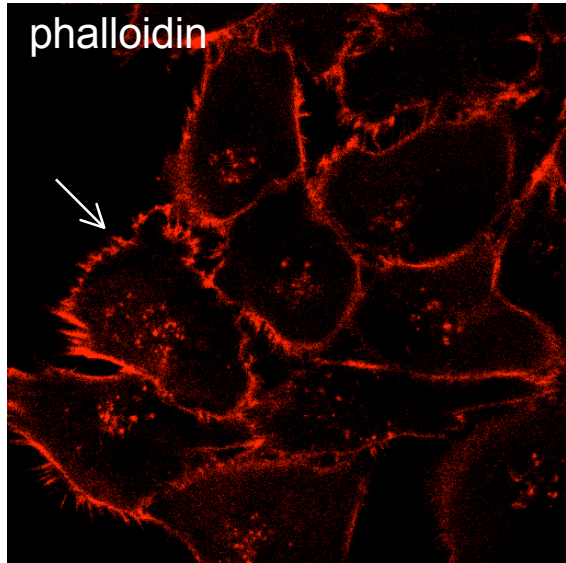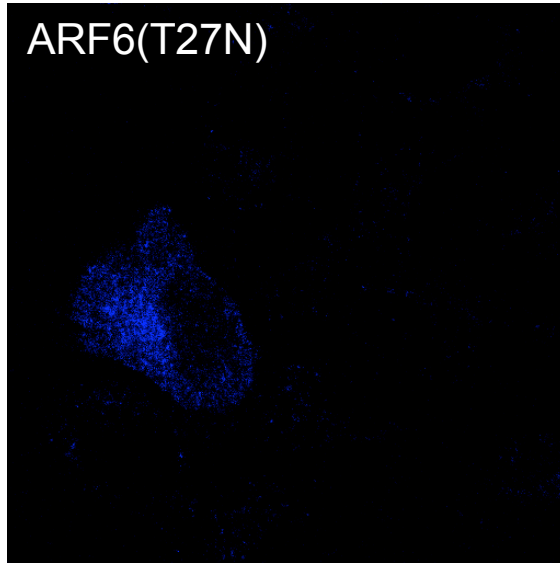

Supplement: pnas_101_26_9671__2.pdf [file pnas_101_26_9671__2.pdf]
